# Supplementary material for: Sall1 Regulates Embryonic Stem Cell Differentiation in Association with Nanog
Source: PubMed Central journal article supplement — J Biol Chem. 2010 Nov 9;286(2):1037–45. doi: 10.1074/jbc.M110.170050 (PMC3020710; doi:10.1074/jbc.m110.170050), 2010-11-09

## Primers

### - For RT

Nanog forward: 5'-CGCTGCTCCGCTCCATAACT-3'

Nanog reverse: 5'-GCGCATGGCTTTCCCTAGTG-3'

Nr0b1 forward: 5'-CTGGTGTGCAGCGTCTGA-3'

Nr0b1 reverse: 5'-GTGTTGGTCTCCGGATCTC-3'

Sall1 forward: 5'-AGTTCTCCCAGGAGGCGAGGTG-3'

Sall1 reverse: 5'-GGTTGGCAGATGTTTCGTAAAGT-3'

Hoxa1 forward: 5'-GGTCAACCCAACGCAGTG-3'

Hoxa1 reverse: 5'-TGCTTCATGCGGCGATT-3'

Otx2 forward: 5'-CCGGAAACAGCGAAGGGA-3'

Otx2 reverse: 5'-GCTGTTGGCGGCACTTAG-3'

Hand1 forward: 5'-ACCAGTTACATCGCCTACTTGA-3'

Hand1 reverse: 5'-CGCGACCACCATCCGTCTT-3'

Flk1 forward: 5'-GGATGGAGGCCTCTACACC-3'

Flk1 reverse: 5'-TGCCGACGAGGATAATGAC-3'

T forward: 5'-GTTCCCGGTGCTGAAGGTAAAT-3'

T reverse: 5'-GCGAGTCTGGGTGGATGTAGA-3'

Isl1 forward: 5'-GCAGCAGCAACCCAACGA-3'

Isl1 reverse: 5'-TTTGCAAGGCGAAGTCAC-3'

Sox17 forward: 5'-CTCTGCCCTGCCGGGATGG-3'

Sox17 reverse: 5'-AATGTCGGGGTAGTTGCAATA-3'

Pou5f1 forward: 5'-CCCTGGGCGTTCTCTTTGGAA-3'

Pou5f1 reverse: 5'-ACCAGGGTCTCCGATTTGCAT-3'

Hoxb8 forward: 5'-AAGCGGAGGATCGAGGTA-3'

Hoxb8 reverse: 5'-GCTCCTCCTGCTCGCATTTAC-3'

Dkk1 forward: 5'-ATCAATTCCAACGCGATCAAG-3'

Dkk1 reverse: 5'-CTTCAGCGCAAGGGTAGG-3'

Goosecoid forward: 5'-TGCTGCCCTACATGAACGTG-3'

Goosecoid reverse: 5'-CTCCAGGGCTTCGAGCTG-3'

Gata6 forward: 5'-GCCACTGTGGAGACGAGA-3'

Gata6 reverse: 5'-CATATAGAGCCCGCAAGCAT-3'

**- For ChIP**

Nanog prom forward: 5'-CTTACTAAGTAGCCCAGTC-3'

Nanog prom reverse: 5'-GTTTATACACGGTTCTTT-3'

Nanog enh forward, 5'-CCACGGAGTCAAGGCCAC-3'

Nanog enh reverse, 5'-CAAACCGCTTCCCTGGAT-3'

Pou5f1 forward, 5'-GGGTCCCTCTCGTCCTAGC-3'

Pou5f1 reverse, 5'-CCTTCTACCACATGGGTCCAA-3'

Nrob1 forward, 5'-CGGGAGTCTTTAGCTCAAC-3'

Nrob1 reverse, 5'-TGTGAAACAGGGTCAAGGC-3'

Sall4 forward, 5'-GGCCTTCAGATCCTGATCCT-3'

Sall4 reverse, 5'-CTTGCCTTCGACTCTTCCGTC-3'

Sox2 forward, 5'-CAAGGGCATTCTCCGAGACT-3'

Sox2 reverse, 5'-TGTTGTGGAGGTGCGGACT-3'

Otx2 forward, 5'-CCCCTGCTCCCTCAACATAA-3'

Otx2 reverse, 5'-CCTGTAGGTCGCAAGAGTCCC-3'

Pax6 forward, 5'-GCTCTGGAATGCGGGAGT-3'

Pax6 reverse, 5'-TGCCTTGGAGGGGGTCATA-3'

Hand1 forward, 5'-GGCCACACCCTGCTACA-3'

Hand1 reverse, 5'-AGTCTGGAGAAGCAACCC-3'

Isl1 forward, 5'-GTGCCCTCCCAAACCTCTAGCC-3'

Isl1 reverse, 5'-AATTCATATCTGCCGGTGTG-3'

Hoxb13 forward, 5'-CCGGTGGGTCTAACACGAG-3'

Hoxb13 reverse, 5'-GGAAGAAGTGCCTAGAAC-3'

T forward, 5'-CTGCCTTCTTGTTCTTTATCAGC-3'

T reverse, 5'-CCCAGGTGTACCGACCACT-3'

$\beta$ -globin forward, 5'-TGGCCTTGAATCACTTGGA-3'

$\beta$ -globin reverse, 5'-AGGAGGTGCCCATCAGAC-3'

Spry2 forward: 5'-CAGCCCACCTGAGGTAGTAA-3'

Spry2 reverse: 5'-TGAAGCCACTCCCAATTCC-3'

### Supporting figure legends

**Figure S1: Specificity of Sall1 and Nanog antibodies.** Comparison of commercial (com) versus affinity-purified antibodies against Sall1 and Nanog. The antibodies were tested in western blotting on ES cell nuclear extracts.

**Figure S2: Selected targets of Sall1 and Nanog as viewed in Integrated Genome Browser (IGB) during microarray analysis.** IGB images showing Sall1, Nanog and a non-specific factor (Fras) binding on 13 selected gene loci that were validated in Fig.S3.

**Figure S3: Validation of ChIP-on-chip data.** Data for 13 selected genes were tested by chromatin immunoprecipitation and qPCR.

**Figure S4: Determination of best binding sequences for Sall1 and Nanog using the Weeder algorithm.**

**Figure S5: mRNA levels of pluripotency and differentiation genes during EB differentiation in wt ES and clones stably overexpressing Sall1.** Oct4 and Nrobl (pluripotency genes) and Sox17 and Gata6 (endodermal differentiation genes) are similarly regulated during EB formation in wt ES (◆) and in clones stably expressing Sall1 (▲). Data were obtained from 3 independent clones.

# Supplement figure 1

com

pure

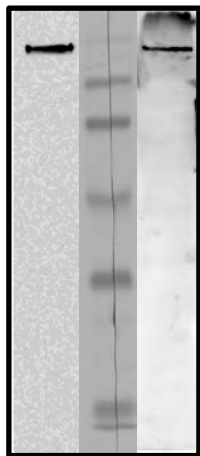

W.B.: $\alpha$ -Sall1

com

pure

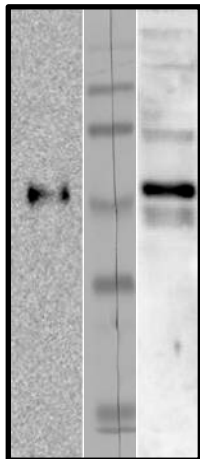

W.B.: $\alpha$ -Nanog

# Supplement figure 2

$\alpha$ -Nanog

$\alpha$ -Sall1

$\alpha$ -Fras

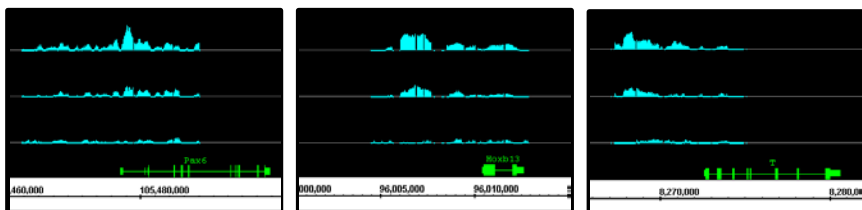

$\alpha$ -Nanog

$\alpha$ -Sall1

$\alpha$ -Fras

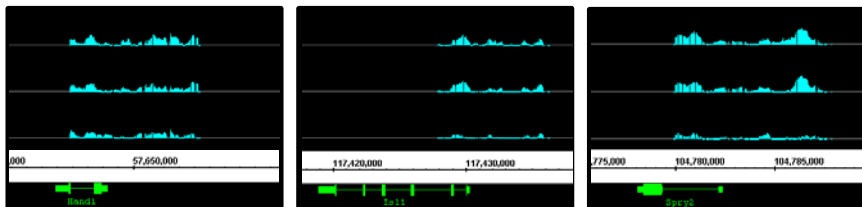

$\alpha$ -Nanog

$\alpha$ -Sall1

$\alpha$ -Fras

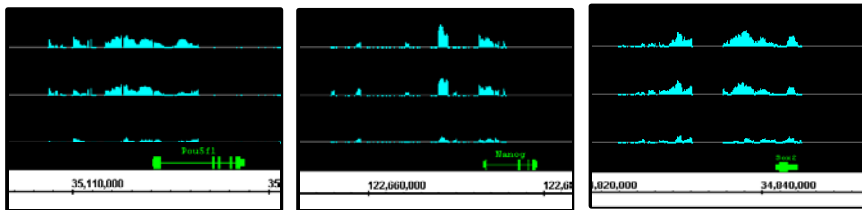

$\alpha$ -Nanog

$\alpha$ -Sall1

$\alpha$ -Fras

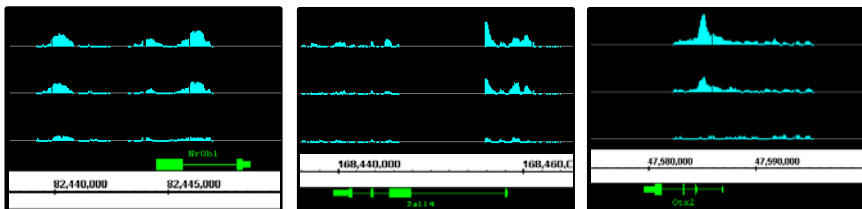

$\alpha$ -Nanog

$\alpha$ -Sall1

$\alpha$ -Fras

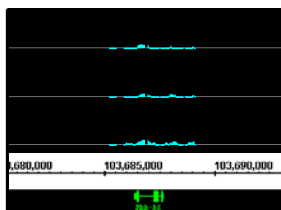

## Supplement figure 3

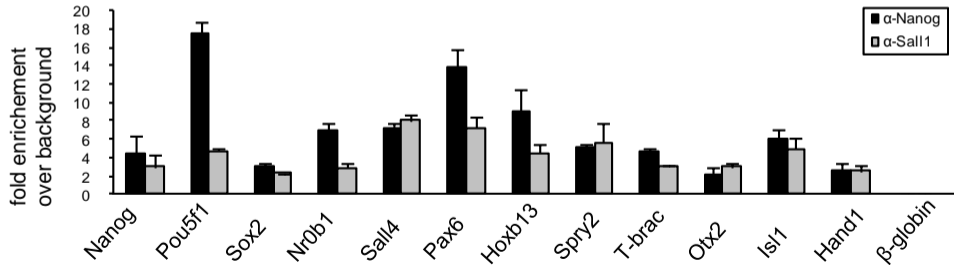

# Supplement figure 4

| Nanog | All occurrences |     |     |     | Best occurrences |    |    |    |
|-------|-----------------|-----|-----|-----|------------------|----|----|----|
|       | A               | C   | G   | T   | A                | C  | G  | T  |
| 1     | 18              | 132 | 9   | 15  | 4                | 27 | 0  | 4  |
| 2     | 143             | 15  | 2   | 14  | 31               | 3  | 0  | 1  |
| 3     | 7               | 10  | 8   | 149 | 0                | 0  | 0  | 1  |
| 4     | 10              | 15  | 5   | 144 | 0                | 1  | 0  | 34 |
| 5     | 11              | 6   | 7   | 150 | 0                | 0  | 0  | 35 |
| 6     | 20              | 19  | 117 | 18  | 4                | 3  | 27 | 1  |
| 7     | 25              | 122 | 12  | 15  | 3                | 31 | 0  | 1  |
| 8     | 138             | 13  | 7   | 16  | 33               | 0  | 0  | 2  |
| Sall1 | All occurrences |     |     |     | Best occurrences |    |    |    |
|       | A               | C   | G   | T   | A                | C  | G  | T  |
| 1     | 81              | 6   | 4   | 5   | 28               | 0  | 0  | 1  |
| 2     | 4               | 10  | 2   | 80  | 0                | 1  | 0  | 28 |
| 3     | 7               | 3   | 0   | 86  | 0                | 0  | 0  | 29 |
| 4     | 5               | 81  | 5   | 5   | 0                | 29 | 0  | 0  |
| 5     | 11              | 67  | 1   | 17  | 4                | 17 | 0  | 8  |
| 6     | 22              | 23  | 40  | 11  | 10               | 10 | 7  | 2  |
| 7     | 80              | 6   | 1   | 9   | 26               | 0  | 0  | 3  |
| 8     | 8               | 74  | 6   | 8   | 1                | 23 | 1  | 4  |

# Supplement figure 5

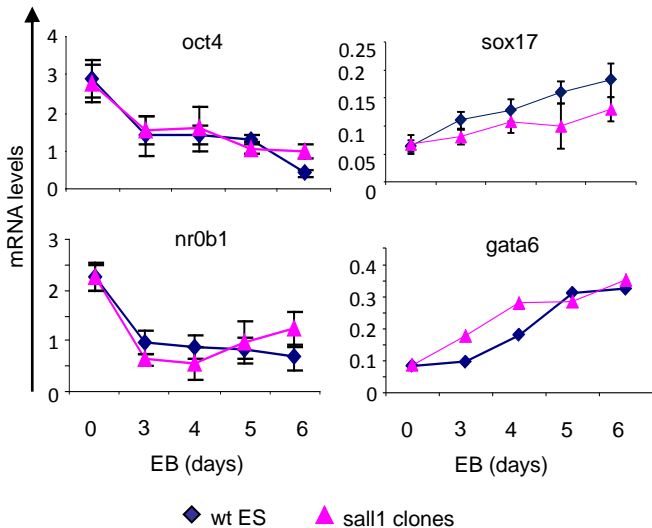

Supplement: supp_M110.170050_jbc.M110.170050-2.pdf [file supp_M110.170050_jbc.M110.170050-2.pdf]
